# Supplementary material for: Telomerase reactivation reverses tissue degeneration in aged telomerase-deficient mice
Source: Springer Nature journal article supplement (doi:10.1038/nature09603), 2010-11-28
Supplement: 41586_2011_BFnature09603_MOESM27_ESM.pdf [file 41586_2011_BFnature09603_MOESM27_ESM.pdf]

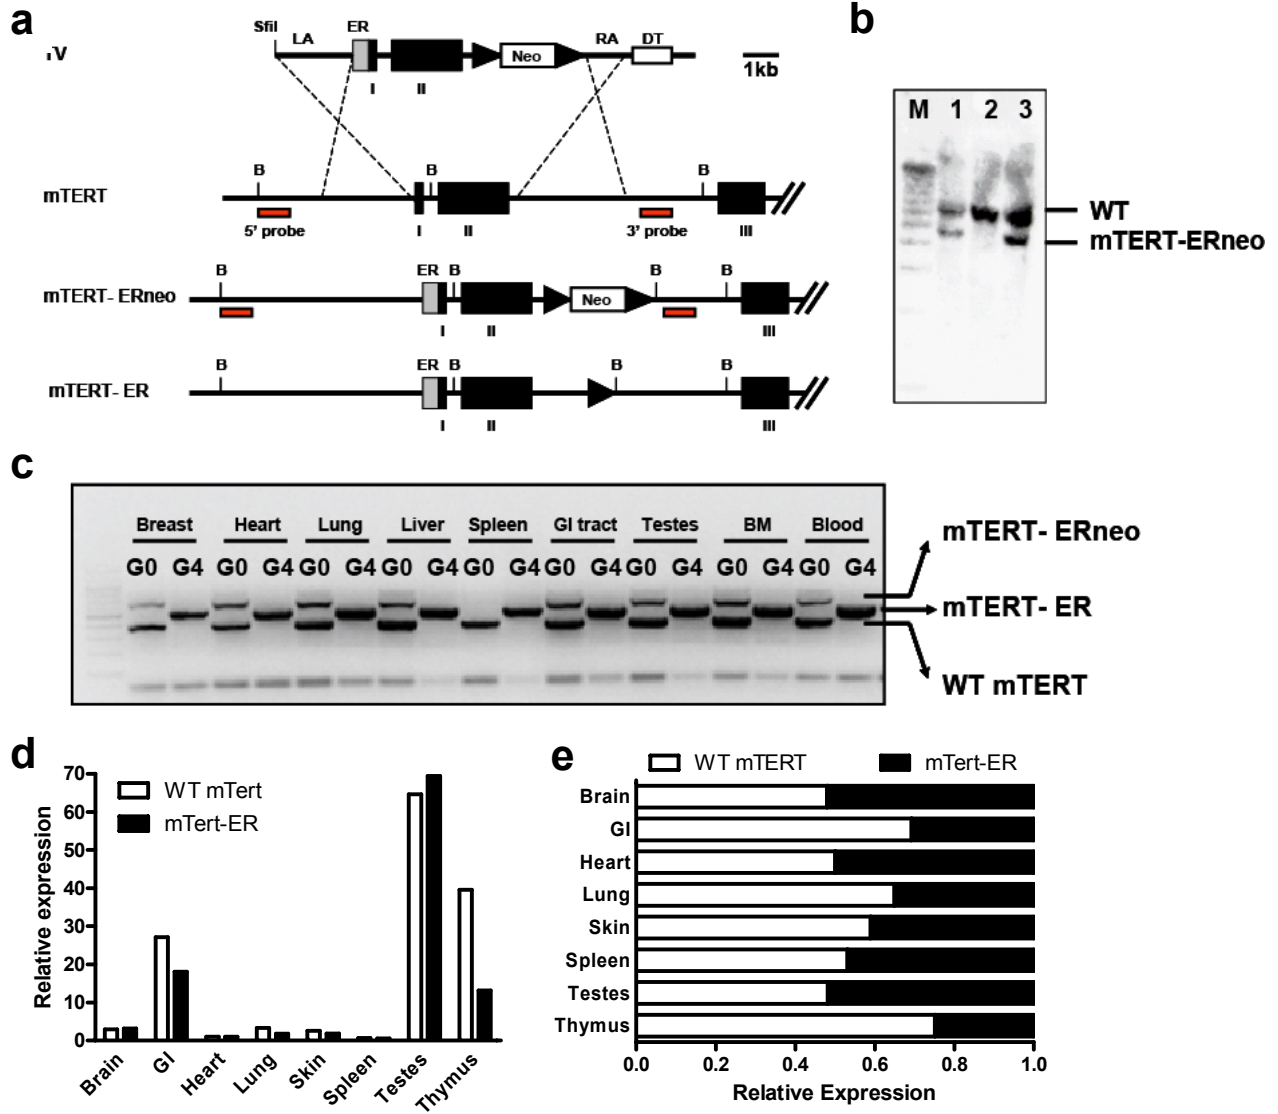

**Figure S1. Generation of TERT-ER knock-in chimeras and validation of germline transmission.** (a) Schematic of targeting vector used to generate the knock-in mTERT-ER allele. TG: targeting vector; WT, wild type allele; KI, knock-in allele; SfiI, enzyme used to linearize the vector; LA, left arm; KF, Kozak-Flag sequence; ER, modified estrogen receptor (ERT2) ligand binding domain; I, II, exons I and II; black triangles, loxP sequences; pgk-neo, pgk promoter and G418 resistance gene; RA, Right arm; DT, diphtheria toxin gene; BamHI, enzyme used for the screening. All TERT-ER mice used in this study derive from TERT-ERneo x EIIA-cre crosses. Of note, the EIIA-cre allele was bred out to eliminate unspecific DNA damage caused by persistent CRE recombinase activity (b) Southern blot probed with 3' probe showing germline transmission of mTERT-ERneo allele in pups 1 and 3. M, molecular weight markers (c) Genotyping primers distinguish between wt TERT, TERT-ERneo and TERT-ER alleles after CRE deletion. Representative gel showing PCR products derived from genomic DNA from several tissues harvested from a heterozygous (G0) and a homozygous (G4) TERT-ER mouse. (d, e) Expression levels for wildtype TERT (white) and TERT-ER (black) alleles by quantitative real-time PCR in various tissues harvested from a heterozygous (G0) TERT-ER mouse relative to housekeeping gene R15 (d) and each other (e).

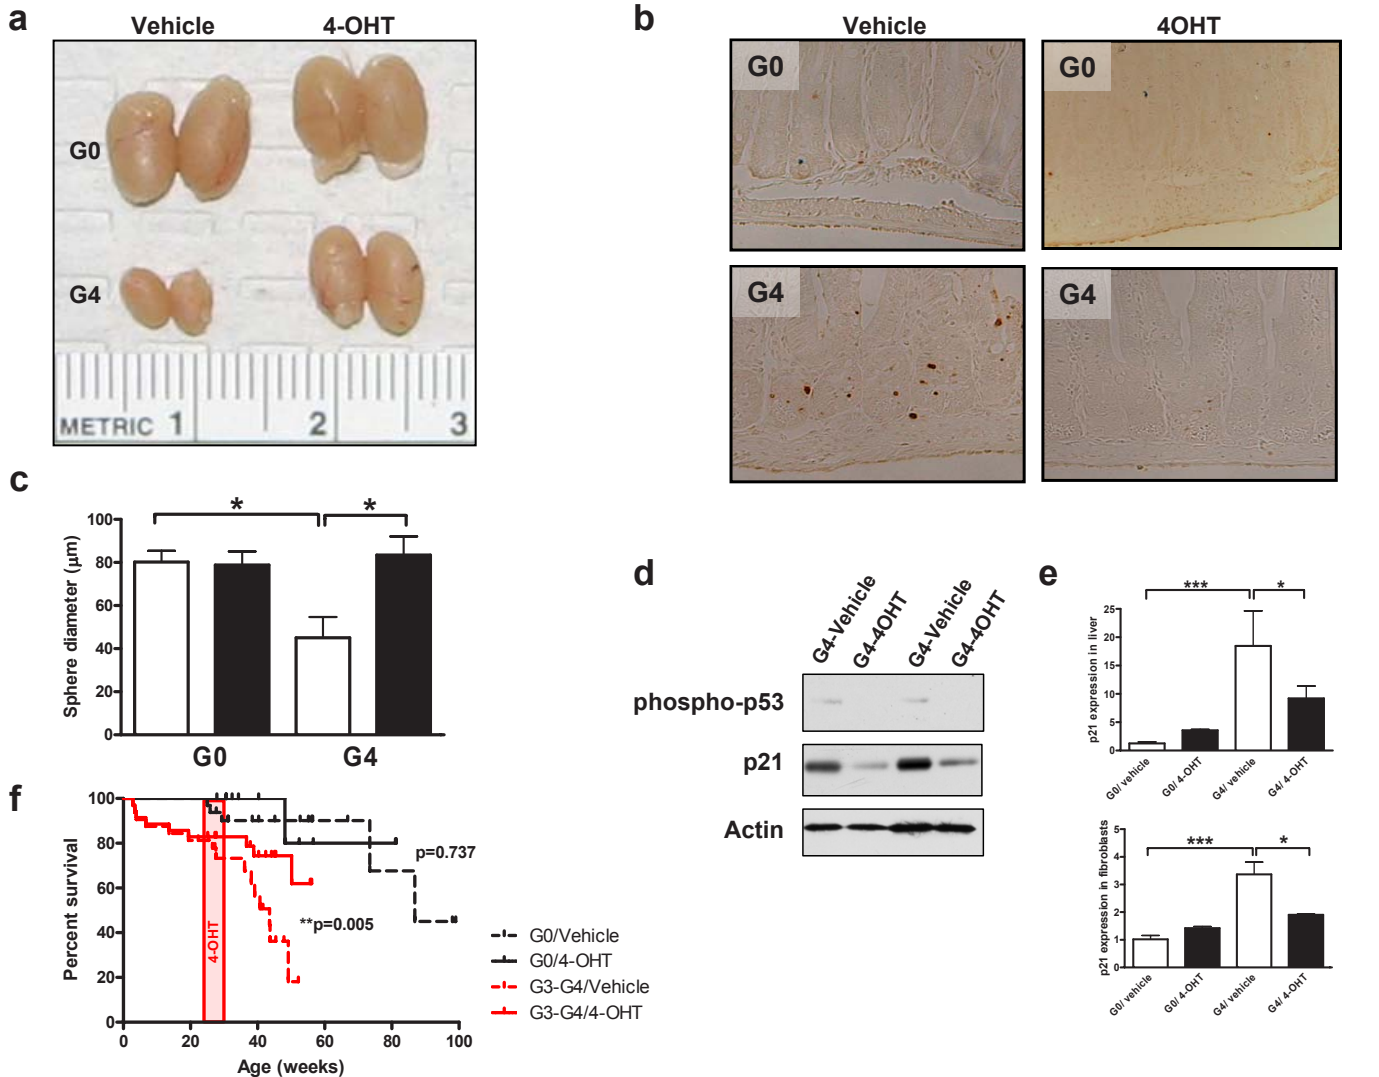

**Figure S2. Effects of telomerase reactivation on adult TERT-ER testes, intestinal crypts, liver, NSCs and overall survival.** (a) Representative photograph of testes from age-matched G0 (top) and G4 (bottom) TERT-ER mice, treated for 4 weeks with vehicle (left) or 4-OHT (right). (b) Small intestine sections from age-matched G0 (top) and G4 (bottom) TERT-ER mice, treated for 4 weeks with vehicle (left) or 4-OHT (right) were stained with a TUNEL kit to visualize apoptotic cells. (c) Average neurosphere size (long axis) for G0 and G4<sup>TERT-ER</sup> NSCs cultured for 2 weeks in the presence of vehicle (open bars) or 100nM 4-OHT (filled bars). (d) Western blot of liver protein extracts probed with antibodies specific for phospho-p53 (Ser15), p21 and  $\beta$ -actin. (e) p21 expression in liver and in adult skin fibroblasts as determined by RT-PCR. (f) Kaplan-Meier analysis of overall survival for G0 (black) and G4<sup>TERT-ER</sup> (red) males. The pink rectangle represents the window of treatment with 4-OHT (solid line) or vehicle (dotted line). G0/vehicle, n=32; G0/4-OHT, n=21; G4/vehicle, n=32; G4/4-OHT, n=29.

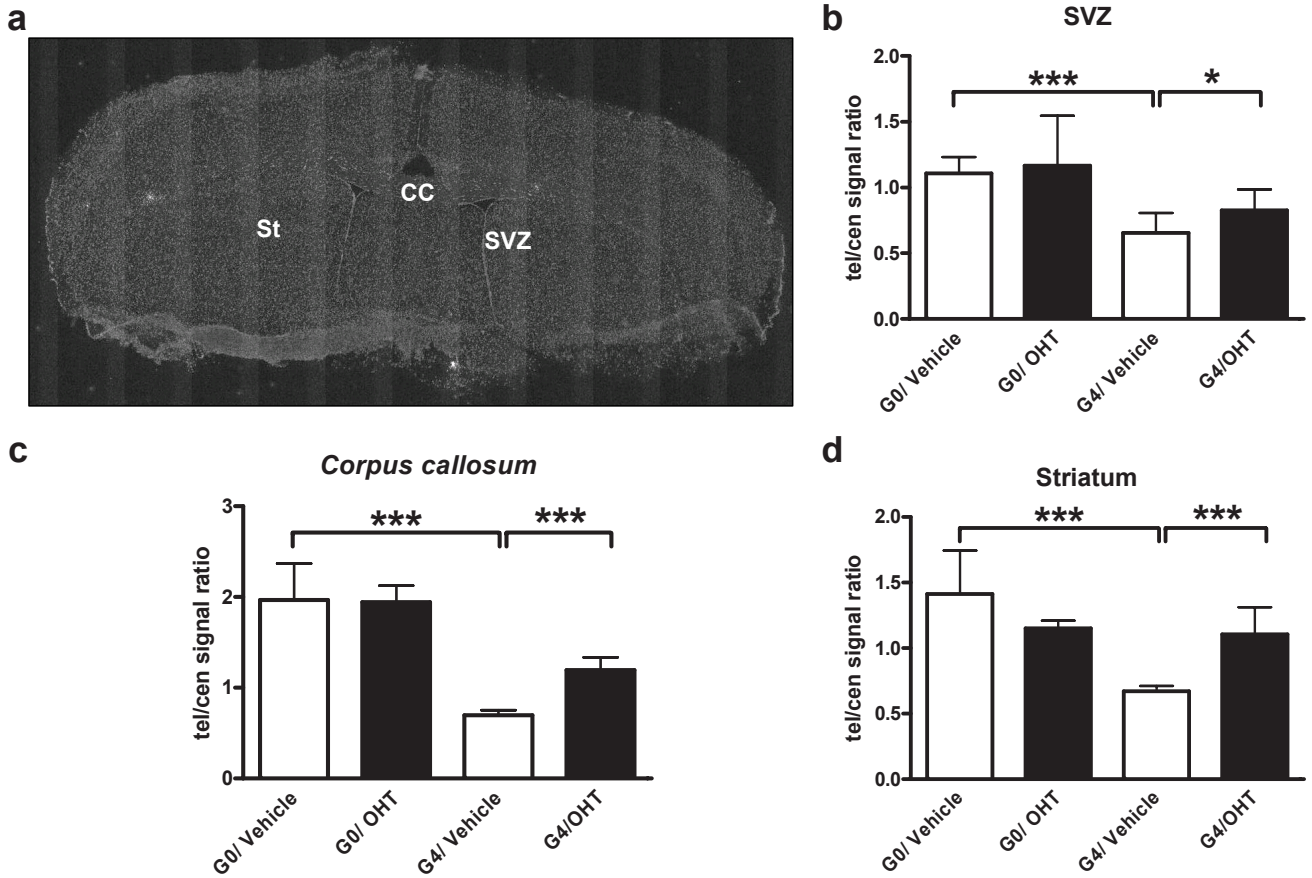

**Figure S3. Telomere elongation after telomerase reactivation in the brain.** (a) Representative scanning of a brain frozen section stained for nucleus visualization showing the selected areas for quantitative FISH analysis. SVZ, subventricular zone; CC, *corpus callosum*; St: *striatum*. (b,c,d) Telomeric-specific FISH signal relative to centromeric signal is depicted for SVZ, CC and striatum (St). Genotypes and treatment regimens are indicated along the x axis for each sample.

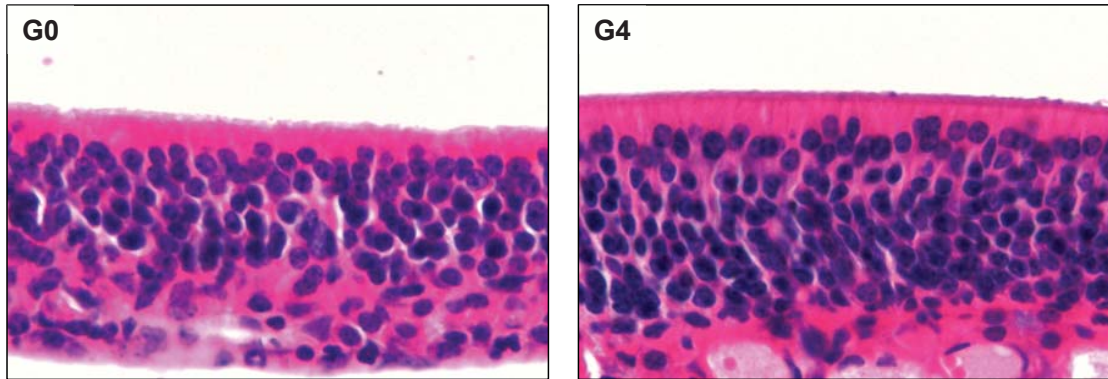

**Figure S4. Olfactory epithelium is not grossly affected by telomere dysfunction.**  
Representative H&E stained section of olfactory epithelium from the olfactory turbinate of an adult G0 (left) and a G4 (right) TERT-ER mouse.

| [2-MB] (M)           | G0 TERT-ER | G4 TERT-ER |
|----------------------|------------|------------|
| 0                    | 819        | 689        |
| $1.7 \times 10^{-6}$ | 486        | 422        |
| $1.7 \times 10^{-5}$ | 545        | 400        |
| $1.7 \times 10^{-4}$ | 431        | 487        |

**Table S1. Mean total distance moved (cm) during testing period ( $p > 0.05$ )**

| [2-MB] (M)           | G0/placebo | G4/placebo       | G0/4OHT | G4/4OHT |
|----------------------|------------|------------------|---------|---------|
| 0                    | 7          | 11               | 6       | 6       |
| $1.7 \times 10^{-6}$ | 2          | 4                | 2       | 2       |
| $1.7 \times 10^{-5}$ | 1          | 6 <sup>***</sup> | 1       | 1       |
| $1.7 \times 10^{-4}$ | 1          | 1                | 1       | 2       |

**Table S2. Mean frequency of entry into odor zone (n) (\*\* $p < 0.0001$ ).**

|                 | Forward                      | Reverse                      |
|-----------------|------------------------------|------------------------------|
| <i>p21</i>      | AGCCTGAAGACTGTGATGGG         | AAAGTTCCACCGTTCTCGG          |
| <i>gapdh</i>    | GACCCCTTCATTGACCTCAACT<br>AC | TGGTGGTGCAGGATGCATTGC<br>TGA |
| <i>wt- tert</i> | TGGGGCCCGAGGGCAGGCCGG        | GCTCGCAGAGTCTCTGCACA         |
| <i>tert-ER</i>  | ATGACCTGCTGCTGGAGATG         | AAAGGTTGCCAGCGGCCACA         |

**Table S3. Oligonucleotide primer sequences used for RT-PCR.**
